1           **Heimdallarchaeota harness light energy through photosynthesis**

2                           Rui Liu<sup>1,2,4</sup>, Ruining Cai<sup>1,2,3,4</sup>, Jing Zhang<sup>1,2,3,4</sup>, Chaomin Sun<sup>1,2,4\*</sup>

3           <sup>1</sup>Key Laboratory of Experimental Marine Biology, Institute of Oceanology, Chinese  
4           Academy of Sciences, Qingdao, China

5           <sup>2</sup>Laboratory for Marine Biology and Biotechnology, Pilot National Laboratory for  
6           Marine Science and Technology, Qingdao, China

7           <sup>3</sup>College of earth science, University of Chinese Academy of Sciences, Beijing,  
8           China

9           <sup>4</sup>Center of Ocean Mega-Science, Chinese Academy of Sciences, Qingdao, China

10

11           \* Corresponding author

12           Chaomin Sun     Tel.: +86 532 82898857; fax: +86 532 82898857.

13                           E-mail address: [sunchaomin@qdio.ac.cn](mailto:sunchaomin@qdio.ac.cn)

14

15

16           **Keywords:** Heimdallarchaeota, photosynthesis, deep-sea, metagenomics, ancestor

17

18

19

20

21

22

23

24

25

26

27

28

29

30

31

32 **Abstract**

33 Photosynthesis is an ancient process that originated after the origin of life, and has  
34 only been found in the Bacterial and Eukaryotic kingdoms, but has never been  
35 reported in any member of the domain Archaea. Heimdallarchaeota, a member of  
36 Asgard archaea, are supposed as the most probable candidates (to date) for the  
37 archaeal protoeukaryote ancestor and might exist in light-exposed habitats during  
38 their evolutionary history. Here we describe the discovery that Heimdallarchaeota  
39 genomes are enriched for proteins formerly considered specific to photosynthetic  
40 apparatus and are suggestive performing oxygenic photosynthesis. Our results provide  
41 strong support for hypotheses in which Heimdallarchaeota harvest light by  
42 bacteriochlorophyll and/or carotenoid, then transport electron from photosystems to  
43 Calvin-Benson-Bassham cycle along with CO<sub>2</sub> fixation and ATP biosynthesis, and  
44 release oxygen as a waste product. Given the possessing of phototrophic lifestyle  
45 together with other anaerobic and aerobic metabolic pathways, Heimdallarchaeota are  
46 firmly believed to be photomixotrophic and have a facultative aerobic metabolism.  
47 Our results expand our knowledge that archaea have played an important role in the  
48 molecular evolution of eukaryotic photosynthesis and raise the significant possibility  
49 that Heimdallarchaeota might be ancestor of eukaryotic photosynthetic organisms.

50

51

52

53

54

55

56

57

58

59

60

61

62

63

64

## 65 **Introduction**

66 Photosynthesis, the foundation for life, result in an enormous increase in biomass  
67 production on Earth and produce oxidized compounds serving as electron acceptors  
68 for heterotrophic metabolism<sup>1</sup>. In microbiology, organisms that perform  
69 photosynthesis include Cyanobacteria, Chloroflexi, Firmicutes, Chlorobi,  
70 Proteobacteria, Acidobacteria and Gemmatimonadetes<sup>2</sup>. Among them, only  
71 Cyanobacteria carry out oxygenic photosynthesis using electrons originating from  
72 water to generate oxygen as product, and evolve in ancestral near the time to the rise  
73 of oxygen and eventually result the Great Oxidation Event on Earth<sup>3</sup>. Till date,  
74 microbial photosynthesis has been only found in bacteria but not in any reported  
75 archaea except a functional bacteriochlorophyll synthase identified in an uncultivated  
76 Crenarchaeota, which provides the only clue of photosynthesis existing in Archaea<sup>4</sup>.

77 Breakthroughs in environmental and metagenomic sequencing technologies are  
78 rapidly transforming the landscape for microbial evolution, especially the discovery  
79 of Asgard phylum archaea and their supposed position at the base of the eukaryotic  
80 tree of life<sup>5</sup>. It stands to reason that many phototrophs remain to be discovered, thus  
81 we want to ask if these metagenomic efforts help us to uncover phototrophic Archaea.  
82 Heimdallarchaeota are a member of Asgard superphylum archaea and currently  
83 represent the predicted closest archaeal relative of eukaryotes, and might exist in  
84 light-exposed habitats in their evolution history<sup>5-8</sup>. However, due to far less assembled  
85 genomes of Heimdallarchaeota than other Asgard members, no more light-dependent  
86 lifestyle details of this uncultured archaea have been disclosed. In the present study,  
87 nine high-quality assembled genomes of Heimdallarchaeota were obtained, and  
88 specific analyses of their reconstructed genomes provide solid proof that  
89 Heimdallarchaeota could utilize light energy through bacteriochlorophyll and/or  
90 carotenoid-based oxygenic photosynthesis. Given the closest eocytic lineage to  
91 eukaryotes, Heimdallarchaeota are proposed to be ancestor of eukaryotic  
92 photosynthetic organisms.

## 93 **Results and Discussion**

### 94 **Photosynthetic apparatus in Heimdallarchaeota**

95 To gain insight into the light utilizing characteristics in Heimdallarchaeota, we  
96 sampled aquatic sediments from a typical cold seep in South China Sea and two  
97 hydrothermal vents in Western pacific (Expanded Data Fig. 1 and Extended Data  
98 Table 1) with distinct chemical parameters (Expanded Data Fig. 2). Total DNA was  
99 extracted from all samples and sequenced, and nine high quality (>50% completeness,  
100 <10% contamination) metagenome-assembled genomes (MAGs) of  
101 Heimdallarchaeota were obtained by utilizing a hybrid binning strategy and  
102 performing manual inspection and data curation (Extended Data Table 2). The  
103 maximum-likelihood phylogenetic tree, based on concatenation of 37 marker genes  
104 including 13 small subunit (SSU) and 16 large subunit (LSU) ribosomal RNA genes,  
105 showed that both our and published Heimdallarchaeota MAGs clustered with other  
106 Asgard superphylum members and displayed a much closer evolutionary linkage with  
107 eukaryotes than other archaeal superphyla including DPANN, TACK and  
108 Euryarchaeota (Extended Data Fig. 3 and Supplementary Table 1). In accordance with  
109 other Asgard members, credible eukaryote-specific proteins (ESPs) were identified in  
110 our Heimdallarchaeota MAGs (Extended Data Fig. 4, Supplementary Table 2), which  
111 confirms Heimdallarchaeota as the current best candidate for the closest archaeal  
112 relatives of the eukaryotic nuclear lineage as described previously<sup>5,6</sup>. Different with  
113 previous report about the existence of rhodopsins in Heimdallarchaeota<sup>1</sup>, there is no  
114 any rhodopsin homologs identified in the present nine Heimdallarchaeota MAGs.  
115 However, many typical chloroplastic proteins (including protochlorophyllide  
116 reductase, chlorophyll(ide) b reductases NOL/NYC1, NAD(P)H quinone  
117 oxidoreductase, photosystem I assembly proteins Ycf3 and phycocyanobilin lyase)  
118 were surprisingly identified in our Heimdallarchaeota MAGs (Extended Data Fig. 4  
119 and Supplementary Table 2), indicating that Heimdallarchaeota might be a kind of  
120 unprecedented photosynthetic organism.

121 To carefully determine the photosynthetic position of Heimdallarchaeota, we  
122 performed various in-depth photosynthetic analyses based on our and published  
123 Heimdallarchaeota MAGs. It is well known that for the energy of sunlight to be  
124 converted and stored into biological systems, it must first be captured by the pigments  
125 present in the photosynthetic organisms. All photosynthetic organisms synthesize two

126 types of pigments: (a) bacteriochlorophylls and/or chlorophylls, which function in  
127 both light harvesting and photochemistry, and (b) carotenoids, which primarily act as  
128 photoprotective pigments but can also function in light harvesting<sup>9</sup>. Notably, almost  
129 all necessary bacteriochlorophyll synthesis components widely distribute in  
130 Heimdallarchaeota MAGs, which provides sufficient evidence that Heimdallarchaeota  
131 could synthesize bacteriochlorophyll (Fig. 1a, Supplementary Table 3). Among the  
132 key enzymes synthesizing bacteriochlorophyll, protochlorophyllide reductase (Por)  
133 could catalyze the reaction of transition between divinyl protochlorophyllide and  
134 divinyl chlorophyllide a<sup>10</sup>. By the phylogenetic analysis, most of Por homologs in our  
135 Heimdallarchaeota MAGs clustered in a single clade at the root of the tree (Fig. 1b,  
136 Supplementary Table 3). However, one Por homolog in H2.bin.2 was found to locate  
137 in a sister clade with typical photosynthetic organisms including Cyanobacteria,  
138 Algae and Streptophytina (Plants), and they further clustered with phototrophic  
139 bacteria containing Chlorobi, Chloroflexi and Proteobacteria (Rhodospirillales and  
140 Chromatiales), revealing the potential Heimdallarchaeota-phototrophs affiliation. The  
141 bacteriochlorophyll synthase (BCS) is capable of synthesizing bacteriochlorophyll a  
142 by esterification of bacteriochlorophyllide with phytyl diphosphate or geranylgeranyl  
143 diphosphate<sup>4</sup>, and it is also annotated as digeranylgeranylglyceryl phosphate synthase  
144 (DGPS). We further phylogenetically analyzed the evolutionary relationship between  
145 BCS and DGPS, and the results showed that all archaeal DGPS located at the root,  
146 which separating from the clade containing BCS from phototrophic bacteria and  
147 chlorophyll synthase from photosynthetic organisms (Fig. 1c, Supplementary Table 3).  
148 And homologous proteins of BCS in our Heimdallarchaeota MAGs clustered a clade  
149 with the DGPS in Heimdallarchaeota LC2, which located at a position between DGPS  
150 and BCS branches (Fig. 1c, Supplementary Table 3). Furthermore, a previous  
151 reported functional bacteriochlorophyll synthase derived from the uncultured  
152 Crenarchaeota<sup>4</sup> was found to cluster a branch with the DGPS from Heimdallarchaeota  
153 LC3<sup>5</sup>, and this cluster displayed a close evolutionary relationship with those  
154 photosynthetic bacteriochlorophyll and chlorophyll synthase branches (Fig. 1c).  
155 Although the function of these putative bacteriochlorophyll associated proteins  
156 remains to be elucidated, it is tempting to speculate that Heimdallarchaeota have a  
157 bacteriochlorophyll producing capability. It is known that bacteriochlorophylls or  
158 chlorophylls exist in only photosynthetic organisms<sup>3,11</sup>. The evidence of  
159 bacteriochlorophyll production in both Heimdallarchaeota and Crenarchaeota

160 suggests that archaea should have played an important role in the molecular evolution  
161 of bacteriochlorophyll synthase, and raises the significant possibility that the origin of  
162 photosynthesis probably predates the divergence of bacteria and archaea.

163 In addition bacteriochlorophyll, other photosynthetic pigments including  
164 carotenoid<sup>9</sup> and bacteriophytochrome<sup>12</sup> were also identified to be synthesized in  
165 Heimdallarchaeota. Particularly for carotenoid, it is a kind of ubiquitous and essential  
166 pigment in photosynthesis<sup>9</sup>, and functions as accessory light-harvesting pigment and  
167 transfers the absorbed energy to bacteriochlorophylls, which expands the wavelength  
168 range of light that is able to drive photosynthesis<sup>13,14</sup>. We reconstructed the complete  
169 synthesis pathway of lycopene<sup>15</sup>, a biologically important carotenoid, derived from  
170 acetyl-CoA according to the Heimdallarchaeota MAGs (Fig. 1d, Supplementary Table  
171 3). It has been mentioned that chlorophylls in photosynthesis ineffectively absorbed  
172 much light in the 450-550 nm (blue-green light) region of the solar radiation spectrum,  
173 while the light within this range can be effectively absorbed by carotenoids<sup>9</sup>.  
174 Moreover, carotenoids protect the organisms from photodamage by quenching both  
175 singlet or triplet states of bacteriochlorophylls under strong illumination and function  
176 as photosynthetic membrane stabilizers in chloroplasts<sup>9</sup>. Therefore, the biosynthesis  
177 of carotenoid in Heimdallarchaeota could coordinate with bacteriochlorophyll for  
178 high-efficiency photosynthesis, which provides an opportunity for competitive  
179 advantage in any particular habitat.

180 Besides photosynthetic pigments, many key factors related to reaction centers  
181 (including photosystem I (PS I) assembly proteins BtpA and Ycf3<sup>16,17</sup>; PSI subunit  
182 VII PsaC<sup>18</sup>; photosystem II (PS II) stability/assembly factor related protein Ycf48<sup>19</sup>;  
183 antenna proteins in PSII (phycocyanobilin lyase, CpcE and bilin biosynthesis protein,  
184 CpeU)<sup>20,21</sup>), carbon fixation system and ATP synthase have also been identified in  
185 Heimdallarchaeota MAGs (Extended Data Fig. 5, Supplementary Table 4). Taken  
186 together, the ubiquitous identification of photosynthetic apparatus and existence of  
187 both PS I and PS II in the genomes strongly suggest that Heimdallarchaeota are  
188 potential oxygenic photosynthetic organism<sup>9</sup>.

### 189 **Electron transfer and energy production in Heimdallarchaeota**

190 Several lines of evidence support that Heimdallarchaeota perform photosynthesis  
191 based on our study. Logically, in the primary steps of photosynthesis, solar photons  
192 are absorbed by special membrane-associated pigment-protein complexes

193 (light-harvesting antennas) and the electronic excitations are efficiently transferred to  
194 a reaction center<sup>3,22</sup>. The oxygen-evolving photosynthetic organisms have two  
195 photochemical reaction center complexes, PS I and PS II, that work together in a  
196 noncyclic electron transfer chain<sup>22</sup>. As a crucial electron carrier in PS I, phylloquinone  
197 was believed to be synthesized in Heimdallarchaeota (Fig. 2a, Supplementary Table  
198 4). It is known that phylloquinone and its related compound menaquinone shared the  
199 same synthesis route for producing demethylphylloquinol<sup>23</sup>, which is further catalyzed  
200 to phylloquinone or menaquinone by a key enzyme named demethylphylloquinol  
201 methyltransferase (MenG) or demethylmenaquinone methyltransferase (UbiE)<sup>23</sup>.  
202 MenG is responsible for phylloquinone (vitamin K1) synthesis in both plants and  
203 Cyanobacteria, and UbiE is only in charge of menaquinone (vitamin K2) synthesis in  
204 microorganism<sup>23</sup>. Interestingly, both MenG and UbiE homologs were identified in  
205 Heimdallarchaeota MAGs (Supplementary Table 4). Consistently, in the phylogenetic  
206 tree, MenGs from photosynthetic organisms were clustered in a single branch which  
207 made a long distance from UbiE branches. While some MenG and UbiE homologs  
208 from plants, archaea together with Heimdallarchaeota were located exactly between  
209 these two branches (Fig. 2b, Supplementary Table 4). In addition, all enzymes  
210 catalyzing reactions to synthesize plastoquinol, which is further oxidized to  
211 plastoquinone by oxygen to phylloquinone (a key electron transporter in PS II), could  
212 also be identified in Heimdallarchaeota MAGs (Fig. 2c, Supplementary Table 4).  
213 Collectively, Heimdallarchaeota are believed to possess both PS I and PS II.  
214 Furthermore, subsequent electron acceptors including ferredoxin (Fd) and ferredoxin  
215 NADP<sup>+</sup> reductase (FNR)<sup>3</sup> were also found in Heimdallarchaeota MAGs (Fig. 3,  
216 Supplementary Table 4), which confers Heimdallarchaeota oxygenic photosynthetic  
217 capability through two photosystems as that in Cyanobacteria.

218 Overall, we proposed a complete oxygenic photosynthetic pathway existing in  
219 Heimdallarchaeota (Fig. 3). Firstly, PS II absorbs a photon of light to generate a  
220 redox-potential by antenna proteins and reduces plastoquinone as the terminal  
221 electron acceptor<sup>3,22</sup>. The electrons extracted from water are further transported via a  
222 quinone and the cytochrome c complex to PS I with the presence of complex III<sup>24</sup> or  
223 alternative complex III (ACIII)<sup>25</sup> or other homologs existing in Heimdallarchaeota.  
224 Meanwhile, electrons are removed from water by PS II, oxidizing it to molecular  
225 oxygen, which is released as a waste product. Then electrons are carried by  
226 phylloquinone and transferred to Fe<sub>4</sub>-S<sub>4</sub> cluster to generate NADH with electrons from



227 ferredoxin in PSI<sup>3</sup>. After the electron transfer, NAD(P)H is reduced with the electron  
228 delivering from ferredoxin<sup>3,22</sup>, which further participates in Calvin-Benson-Bassham  
229 cycle for carbon fixation and finally to synthesize ATP<sup>3,22</sup>.

### 230 **Heimdallarchaeota are photomixotrophic**

231 Next, to gain further insight into the lifestyle of Heimdallarchaeota, we reconstructed  
232 a complete metabolic pattern according to our and published Heimdallarchaeota  
233 MAGs. Similar with other Asgard superphylum<sup>26</sup>, Heimdallarchaeota possess a  
234 mixotrophic lifestyle, which can simultaneously utilize the reverse tricarboxylic acid  
235 cycle (rTCA) for autotrophic CO<sub>2</sub> assimilation<sup>5,6</sup> and transport the exogenous organic  
236 matter through the metabolic circuitry for their catabolism (Fig. 4, Supplementary  
237 Table 5)<sup>6</sup>. For autotrophic metabolism, the Calvin-Benson-Bassham cycle was found  
238 to participate in carbon fixation through the RuBisCo and act as an intermediary  
239 between photosystems and ATP synthase for energy producing in Heimdallarchaeota  
240 (Fig. 4). Furthermore, a variety of polysaccharide-degrading enzymes, including  
241 chitinase, xylan/chitin deacetylase, diacetylchitobiose deacetylase and cellulase, were  
242 also found in Heimdallarchaeota by CAZy analysis (Extended Date Fig. 6 and  
243 Supplementary Table 5). These enzymes degraded polysaccharides like chitin, xylan  
244 and cellulose to produce oligosaccharides or monosaccharides for energy metabolism  
245 in Heimdallarchaeota. Moreover, methane metabolism pathway and Wood-Ljungdahl  
246 pathway were believed to exist in Heimdallarchaeota MAGs (Fig. 4).

247 Notably, aerobic metabolic pathways were also found to be ubiquitous in  
248 Heimdallarchaeota<sup>6,27</sup>, which completely differed from metabolic characteristics of  
249 anaerobic Lokiarchaeota and Thorarchaeota<sup>5,6,26,27</sup>. Consistent with the results of  
250 previous studies<sup>6</sup>, the complete tricarboxylic-acid cycle (TCA) and oxidative  
251 phosphorylation pathway were found to support the aerobic respiration in  
252 Heimdallarchaeota. And both the aerobic kynurenine pathway and aspartate pathway  
253 for NAD<sup>+</sup> *de novo* synthesis were also reconstructed in the present and previous  
254 published Heimdallarchaeota<sup>6,28</sup>. Particularly, the aerobic kynurenine pathway of  
255 NAD<sup>+</sup> biosynthesis was exclusively found in Heimdallarchaeota compared with other  
256 archaea, which is only present in eukaryotes and very few bacterial groups<sup>28</sup>. This  
257 pathway has been considered to originate from the protoeukaryote ancestor in  
258 oxygen-containing niche, which might be acquired through horizontal gene transfer in  
259 Heimdallarchaeota<sup>6</sup>. In addition, other molecules in oxygen-dependent metabolism,



260 such as aerotaxis receptor and bacterioferritin, were also identified in  
261 Heimdallarchaeota MAGs. All the above evidence indicates that oxygen must be  
262 present in the environment where Heimdallarchaeota inhabit. But this seems to  
263 contradict the strict anaerobic lifestyle existing in other Asgard archaea like  
264 Thorarchaeota and Lokiarchaeota in the same niche<sup>5,6</sup>. Therefore, we infer a more  
265 possible hypothesis that the oxygen presenting intracellular environment of  
266 Heimdallarchaeota might be generated by their performing photosynthesis.  
267 Consistently, Heimdallarchaeota have already evolved protection mechanisms against  
268 the formation of reactive oxygen species (ROS) via superoxide dismutase, catalase,  
269 and carotenoids (Fig. 4). Together, the metabolic reconstructions indicate that  
270 Heimdallarchaeota are photomixotrophic and have a facultative aerobic metabolism.  
271 If this is the fact, what is the ecological function or benefit for having the ability of  
272 photosynthesis in Heimdallarchaeota, which reside predominantly in marine  
273 sediments<sup>5</sup>? Recent study about rhodopsins identified in Heimdallarchaeota provides  
274 evidence of their light-exposed habitats, where Heimdallarchaeota could obtain  
275 enough energy from sunlight through photosynthesis<sup>6</sup>. The recovery of  
276 Heimdallarchaeota from deeper environments may be due to the high deposition rates  
277 characteristic for the sampling locations<sup>6</sup>. Nevertheless, there are plenty evidence  
278 showing that blue-green light with a wavelength range of 450-550 nm might exist in  
279 cold seep environment (~1100 m deep), and both long wavelength light (>650 nm)  
280 and (short wavelength light (<650 nm) could be detected in hydrothermal vents<sup>29,30</sup>,  
281 which provides necessary condition for photosynthetic process. The  
282 Heimdallarchaeota capable of detecting geothermal light and phototaxis could  
283 preferentially occupy an optimum habitat, which confer them evolutionary advantages  
284 in the competition for nutrient resources. Accordingly, a kind of cyanobacterium  
285 collects light and passes excitation energy uphill to the photochemically active  
286 pigments through longer-wavelength chlorophyll f, which facilitates this bacterium to  
287 survive in dark condition<sup>31</sup>. Thus, we suppose that possessing a presumptive  
288 photomixotrophic lifestyle may give Heimdallarchaeota more flexibility to survive or  
289 adapt to the deep-sea harsh conditions.

## 290 **A potential ancestor of eukaryotic photosynthetic organisms**

291 Notably, given the close match of the emission spectra of geothermal light and the  
292 absorption spectra of bacteriochlorophylls *a* and *b*, photosynthesis was proposed to

293 arise from bacteriochlorophyll *a*- or *b*-containing organisms near oceanic  
294 hydrothermal vents where weak infrared radiation could be detected<sup>32</sup>. In the  
295 evolution history of photosynthesis, the organisms were thought to initially use the  
296 bacteriochlorophyll pigments to sense infrared light, and started making use of the  
297 near-infrared part of sunlight when moving to shallow water through further  
298 adaptation of a primitive photosystem, and chlorophylls would be eventually  
299 developed to make use of higher energy (visible) light to split water<sup>32,33</sup>. Meanwhile,  
300 during the evolution process of oxygenic photosynthesis, a bioinorganic  
301 water-oxidizing complex (WOC) was thought to serve as a redox capacitor to  
302 accomplish the oxidation of two water molecules to produce O<sub>2</sub> in PS II, which is  
303 comprised with a Mn<sub>3</sub>CaO<sub>4</sub> distorted cubane structure bound to a fourth Mn by  
304 oxo-bridges<sup>3,34</sup>. And photoassembly of the WOC requires only Mn<sup>2+</sup> and light to form  
305 the high-valent WOC<sup>3</sup>. Interestingly, an extremely high concentration of manganese  
306 element was detected in our sampling hydrothermal vent (Extended Data Fig. 2),  
307 which might promote WOC formation and play a key role in the acquiring and  
308 developing of photosynthesis in Heimdallarchaeota. Consistently, Heimdallarchaeota  
309 MAGs H2.bin.2 and H2.bin.81 derived from hydrothermal vent possess much more  
310 photosynthetic characteristics than those from cold seep in our present work.  
311 Therefore, in combination with the facts that Heimdallarchaeota are the most probable  
312 candidates for the archaeal protoeukaryote ancestor in previous report<sup>6</sup> and the first  
313 identified photosynthetic archaea in this study, we propose that Heimdallarchaeota  
314 might be ancestor of eukaryotic photosynthetic organism.

315 The presence of oxygen-dependent pathways in Heimdallarchaea raises the  
316 possibility that the archaeal eukaryotic photosynthetic ancestor could have also been a  
317 facultative aerobe, and the archaeal-photobacterial endosymbiosist gave birth to the  
318 eukaryotic photosynthetic ancestor took place after the Great Oxidation Event<sup>35</sup>.  
319 Horizontal gene transfer is postulated to play a major role in the evolution of  
320 microbial phototrophs and that many of the essential components of photosynthesis  
321 have conducted horizontal gene transfer<sup>22</sup>. And Heimdallarchaea might obtain the  
322 photosynthetic apparatus through lateral gene transfer from their cyanobacterial  
323 endosymbionts<sup>6,28</sup> because most of key factors associated with photosynthesis in  
324 Heimdallarchaea have high similarity with those from cyanobacteria (Supplementary  
325 Table 5). Our prediction is in agreement with the recent hypothesis that both the  
326 archaeal and bacterial eukaryotic ancestors have an oxygen-dependent metabolism<sup>6</sup>,

327 in which the primordial function of the bacterial counterpart performing oxidative  
328 phosphorylation would not be detrimental to the existence of the archaeal host who  
329 exposed in oxygen environment. Even though the present results provide an updated  
330 perspective on the photosynthetic lifestyle of Heimdallarchaeota, further studies will  
331 be needed to elucidate the light utilizing strategies and evolutionary histories with  
332 their enrichment or even pure culture.

333

## 334 **References**

- 335 1. Martin, W. F., Bryant, D. A. & Beatty, J. T. A physiological perspective on the  
336 origin and evolution of photosynthesis. *FEMS Microbiol. Rev.* **42**, 205-231,  
337 doi:10.1093/femsre/fux056 (2018).
- 338 2. Cardona, T. Reconstructing the origin of oxygenic photosynthesis: do assembly  
339 and photoactivation recapitulate evolution? *Front. Plant Sci.* **7**,  
340 doi:10.3389/Fpls.2016.00257 (2016).
- 341 3. Fischer, W. W., Hemp, J. & Johnson, J. E. Evolution of oxygenic photosynthesis.  
342 *Annu. Rev. Earth Pl. Sc.* **44**, 647-683, doi:10.1146/annurev-earth-060313-054810  
343 (2016).
- 344 4. Meng, J. *et al.* An uncultivated crenarchaeota contains functional  
345 bacteriochlorophyll a synthase. *ISME J.* **3**, 106-116, doi:10.1038/ismej.2008.85  
346 (2009).
- 347 5. Zaremba-Niedzwiedzka, K. *et al.* Asgard archaea illuminate the origin of  
348 eukaryotic cellular complexity. *Nature* **541**, 353-+, doi:10.1038/nature21031  
349 (2017).
- 350 6. Bulzu, P. A. *et al.* Casting light on Asgardarchaeota metabolism in a sunlit  
351 microoxic niche. *Nat. Microbiol.* **4**, 1129-1137, doi:10.1038/s41564-019-0404-y  
352 (2019).
- 353 7. Beja, O. *et al.* Bacterial rhodopsin: Evidence for a new type of phototrophy in the  
354 sea. *Science* **289**, 1902-1906, doi:10.1126/science.289.5486.1902 (2000).
- 355 8. Spang, A. *et al.* Complex archaea that bridge the gap between prokaryotes and  
356 eukaryotes. *Nature* **521**, 173-+, doi:10.1038/nature14447 (2015).
- 357 9. Hashimoto, H., Uragami, C. & Cogdell, R. J. Carotenoids and photosynthesis.  
358 *Subcell. Biochem.* **79**, 111-139, doi:10.1007/978-3-319-39126-7\_4 (2016).
- 359 10. Chew, A. G. & Bryant, D. A. Chlorophyll biosynthesis in bacteria: the origins of  
360 structural and functional diversity. *Annu. Rev. Microbiol.* **61**, 113-129,  
361 doi:10.1146/annurev.micro.61.080706.093242 (2007).
- 362 11. Bryant, D. A. & Frigaard, N. U. Prokaryotic photosynthesis and phototrophy  
363 illuminated. *Trends Microbiol.* **14**, 488-496, doi:10.1016/j.tim.2006.09.001  
364 (2006).

- 365 12. Moran, A. M. Elucidation of primary events in bacteriophytochrome  
366 photoreceptors. *Biophys J.* **111**, 2075-2076, doi:10.1016/j.bpj.2016.10.018  
367 (2016).
- 368 13. Kirilovsky, D. Photosynthesis: Dissipating energy by carotenoids. *Nat. Chem.*  
369 *Biol.* **11**, 242-243, doi:10.1038/nchembio.1771 (2015).
- 370 14. Papagiannakis, E., Kennis, J. T. M., van Stokkum, I. H. M., Cogdell, R. J. & van  
371 Grondelle, R. An alternative carotenoid-to-bacteriochlorophyll energy transfer  
372 pathway in photosynthetic light harvesting. *Proc. Natl. Acad. Sci. U S A* **99**,  
373 6017-6022, doi:10.1073/pnas.092626599 (2002).
- 374 15. Hernandez-Almanza, A. *et al.* Lycopene: progress in microbial production.  
375 *Trends Food Sci. Tech.* **56**, 142-148, doi:10.1016/j.tifs.2016.08.013 (2016).
- 376 16. Zak, E. & Pakrasi, H. B. The BtpA protein stabilizes the reaction center proteins  
377 of photosystem I in the cyanobacterium *Synechocystis* sp. PCC 6803 at low  
378 temperature. *Plant Physiol.* **123**, 215-222, doi:10.1104/pp.123.1.215 (2000).
- 379 17. Nellaepalli, S., Ozawa, S. I., Kuroda, H. & Takahashi, Y. The photosystem I  
380 assembly apparatus consisting of Ycf3-Y3IP1 and Ycf4 modules. *Nat. Commun.*  
381 **9**, 2439, doi:10.1038/s41467-018-04823-3 (2018).
- 382 18. Pi, X. *et al.* The pigment-protein network of a diatom photosystem  
383 II-light-harvesting antenna supercomplex. *Science* **365**,  
384 doi:10.1126/science.aax4406 (2019).
- 385 19. Yu, J. *et al.* Ycf48 involved in the biogenesis of the oxygen-evolving  
386 photosystem II complex is a seven-bladed beta-propeller protein. *Proc. Natl.*  
387 *Acad. Sci. U S A* **115**, E7824-E7833, doi:10.1073/pnas.1800609115 (2018).
- 388 20. Alvey, R. M., Biswas, A., Schluchter, W. M. & Bryant, D. A. Attachment of  
389 noncognate chromophores to CpcA of *Synechocystis* sp. PCC 6803 and  
390 *Synechococcus* sp. PCC 7002 by heterologous expression in *Escherichia coli*.  
391 *Biochemistry* **50**, 4890-4902, doi:10.1021/bi200307s (2011).
- 392 21. Wittkopp, T. M. *et al.* Bilin-dependent photoacclimation in chlamydomonas  
393 reinhardtii. *Plant Cell* **29**, 2711-2726, doi:10.1105/tpc.17.00149 (2017).
- 394 22. Johnson, M. P. Photosynthesis. *Essays Biochem.* **60**, 255-273,  
395 doi:10.1042/EBC20160016 (2016).
- 396 23. Lohmann, A. *et al.* Deficiency in phylloquinone (vitamin K1) methylation affects  
397 prenyl quinone distribution, photosystem I abundance, and anthocyanin  
398 accumulation in the Arabidopsis AtmenG mutant. *J. Biol. Chem.* **281**,  
399 40461-40472, doi:10.1074/jbc.M609412200 (2006).
- 400 24. Xia, D. *et al.* Structural analysis of cytochrome bc1 complexes: implications to  
401 the mechanism of function. *Biochim. Biophys. Acta* **1827**, 1278-1294,  
402 doi:10.1016/j.bbabi.2012.11.008 (2013).
- 403 25. Refojo, P. N., Ribeiro, M. A., Calisto, F., Teixeira, M. & Pereira, M. M.  
404 Structural composition of alternative complex III: variations on the same theme.  
405 *Biochim. Biophys. Acta* **1827**, 1378-1382, doi:10.1016/j.bbabi.2013.01.001  
406 (2013).

- 407 26. Spang, A. *et al.* Proposal of the reverse flow model for the origin of the  
408 eukaryotic cell based on comparative analyses of Asgard archaeal metabolism.  
409 *Nat. Microbiol.* **4**, 1138-1148, doi:10.1038/s41564-019-0406-9 (2019).
- 410 27. Liu, Y. *et al.* Comparative genomic inference suggests mixotrophic lifestyle for  
411 Thorarchaeota. *ISME J.* **12**, 1021-1031, doi:10.1038/s41396-018-0060-x (2018).
- 412 28. Ternes, C. M. & Schonknecht, G. Gene transfers shaped the evolution of de novo  
413 NAD<sup>+</sup> biosynthesis in eukaryotes. *Genome Biol. Evol.* **6**, 2335-2349,  
414 doi:10.1093/gbe/evu185 (2014).
- 415 29. VanDover, C. L., Reynolds, G. T., Chave, A. D. & Tyson, J. A. Light at deep-sea  
416 hydrothermal vents. *Geophys. Res. Lett.* **23**, 2049-2052, doi:10.1029/96gl02151  
417 (1996).
- 418 30. White, S. N., Chave, A. D. & Reynolds, G. T. Investigations of ambient light  
419 emission at deep-sea hydrothermal vents. *J. Geophys. Res-Sol. Ea.* **107**,  
420 doi:10.1029/2000jb000015 (2002).
- 421 31. Nurnberg, D. J. *et al.* Photochemistry beyond the red limit in chlorophyll  
422 f-containing photosystems. *Science* **360**, 1210-1213, doi:10.1126/science.aar8313  
423 (2018).
- 424 32. Nisbet, E. G., Cann, J. R. & VanDover, C. L. Origins of photosynthesis. *Nature*  
425 **373**, 479-480 (1995).
- 426 33. Xiong, J. & Bauer, C. E. Complex evolution of photosynthesis. *Annu. Rev. Plant*  
427 *Biol.* **53**, 503-521, doi:10.1146/annurev.arplant.53.100301.135212 (2002).
- 428 34. Yano, J. & Yachandra, V. Mn<sub>4</sub>Ca cluster in photosynthesis: where and how water  
429 is oxidized to dioxygen. *Chem. Rev.* **114**, 4175-4205, doi:10.1021/cr4004874  
430 (2014).
- 431 35. Betts, H. C. *et al.* Integrated genomic and fossil evidence illuminates life's early  
432 evolution and eukaryote origin. *Nat. Ecol. Evol.* **2**, 1556-1562,  
433 doi:10.1038/s41559-018-0644-x (2018).

434

## 435 **Methods**

436 **Sample collection and processing.** Samples were collected from the cold seep in  
437 South China Sea and hydrothermal vent field in Okinawa trough (Expanded Data  
438 Table 1) during the cruise of the R/V *Kexue* on July of 2017-2018. The sediment  
439 samples (C1, C4, C2 and C5) were collected from cold seep area in South China Sea  
440 at depth intervals of 0-20, 20-40, 40-60 and 280 cm. The other subsurface sediment  
441 (0-20 cm) samples (H1 and H2) were taken at the outside of the “black chimney” of  
442 the hydrothermal vent. Among the specimens, samples C1, H1 and H2 were collected  
443 through the Discovery remotely operated vehicle (ROV), sample C4 was obtained by  
444 the TV grab, while samples C2 and C5 were taken from the gravity sampler.  
445 Sediments were sealed into sterile sampling bags immediately after collection, and



446 stored in -80 °C. DNA for metagenomics analysis was isolated from 20 g (wet  
447 weight) sediment per sample with the PowerSoil DNA Isolation Kit (Qiagen)  
448 following the manufacturer's instructions.

449 **Analyses of environmental and chemical parameters of sampling sites.** The  
450 temperature, salinity, underwater depth of sampling sites were recorded in real-time  
451 by SBE 25plus Sealogger CTD (SBE, USA), and concentrations of CO<sub>2</sub> and CH<sub>4</sub> of  
452 surface sediments were in situ measured with the CONTROS®HydroCO<sub>2</sub>  
453 (CONTROS, Norway) and Hydro@CH<sub>4</sub> (CONTROS, Norway), respectively. All  
454 these sensors were mounted on the Discovery ROV. For chemical element analyses,  
455 sediment samples from cold seep (C1, C2, C4 and C5) in South China Sea and  
456 hydrothermal vent field (H1 and H2) in Okinawa trough were dehydrated in an oven  
457 at 80 °C, respectively, until completely dry. After grinded, powder of samples were  
458 filtered through the 200-mesh screen. The obtained filtrate was further used to analyze  
459 the contents of different chemical elements, including Na, Mg, Fe, Cl, S, P, Mn, Zn,  
460 Ni and Co, by an S8 Tiger X-ray fluorescence spectrometry (BRUKER, Germany).

461 **Library construction and sequencing.** DNA extracts were treated with DNase-free  
462 RNase to eliminate RNA contamination. Then the DNA concentration was measured  
463 by Qubit 3.0 fluorimeter (Thermo Fisher Scientific, USA). DNA integrity was  
464 evaluated by gel electrophoresis and 0.5 µg of each sample was used to prepare  
465 libraries. The DNA was sheared into fragments between 50-800 bp using Covaris  
466 E220 ultrasonicator (Covaris, UK). DNA fragments between 150 bp and 250 bp were  
467 secreted using AMPure XP beads (Agencourt, USA) and then were repaired using T4  
468 DNA polymerase (ENZYMATICS, USA). These DNA fragments were ligated at both  
469 ends to T-tailed adapters and amplified for eight cycles. Finally, the amplification  
470 products were subjected to single-strand circular DNA libraries. All NGS libraries  
471 were sequenced on BGISEQ-500 platform (BGI, China) to obtain 100 bp paired-end  
472 raw reads. Quality control was performed by SOAPnuke (v1.5.6) (setting: -l 20 -q 0.2  
473 -n 0.05 -Q 2 -d -c 0 -5 0 -7 1)<sup>36</sup>.

474 **Genomes assembly, binning and annotation.** The raw shotgun sequencing  
475 metagenomic reads were dereplicated and trimmed by the BGI-Qingdao (BGI, China).  
476 The clean data were assembled using MEGAHIT (v1.1.3, setting: --min-count 2  
477 --k-min 33 --k-max 83 --k-step 10)<sup>37</sup>. Thereafter, metaBAT2<sup>38</sup>, Maxbin2<sup>39</sup> and  
478 Concoct<sup>40</sup> were used to automatically bin from assemblies. Finally, MetaWRAP<sup>41</sup> was  
479 used to purify and generate data to get the final bins. Manual curation was adapted for

480 reducing the genome contamination based on differential coverage, GC content, and  
481 the presence of duplicate genes. The completeness and contamination of the genomes  
482 within bins were then estimated by using CheckM<sup>42</sup>. Gene prediction for individual  
483 genomes was performed using Glimmer (v 3.02)<sup>43</sup>. The KEGG (Kyoto Encyclopedia  
484 of Genes and Genomes, Release 87.0), NR (Non-Redundant Protein Database  
485 databases, 20180814), Swiss-Prot (release-2017\_07) and EggNOG (2015-10\_4.5v)  
486 databases were used to annotate protein functions by default, and the best hits were  
487 chosen. Additionally, database of CAZy (Carbohydrate-Active enZYmes Database)<sup>44</sup>  
488 was downloaded to search for carbohydrate active enzymes from genomic bins.

489 **Phylogenetic analyses.** To reveal the phylum composition of assembled genomes in  
490 the archaea kingdom, the genomic sequences of Archaea were downloaded from  
491 NCBI ref genomes using Aspera (v3.9.8). Then, extract 37 marker genes in genomes  
492 (Supplemental Table 1) were chosen by Phylosift (v1.0.1)<sup>45</sup> with automated setting.  
493 The concatenated sequences were trimmed using TrimAl (version 1.2)<sup>46</sup> using  
494 gappyout function. Finally, maximum likelihood tree was calculated by using  
495 IQ-TREE (v1.6.12)<sup>47</sup> with GTR+F+I+G4 model (-bb 1000) and shown by iTOL  
496 (v5)<sup>48</sup>. For phylogenetic analyses of protochlorophyllide reductase (Por),  
497 bacteriochlorophyll synthase (BCS) and demethylphyloquinol/demethylmenaquinone  
498 methyltransferase (MenG/ubiE) in Heimdallarchaeota bins, the related sequences  
499 were selected from archaea, bacteria and eukaryotes in NCBI and Swiss-Prot  
500 database. The Maximum-Likelihood phylogeny trees were constructed with  
501 WAG+G4, LG+F+I+G4 and LG+G4 model (-bb 1000) by using IQ-TREE,  
502 respectively, and showing with iTOL.

503 **Data availability.** The Heimdallarchaeota genomic bins (C2.bin.3, C4.bin.14,  
504 C4.bin.22, C5.bin.12 and H2.bin.2) supporting the results of this study are available in  
505 NCBI Genbank under the accession numbers: SAMN13483368, SAMN13483369,  
506 SAMN13483392, SAMN13483370 and SAMN13483372 in BioProject  
507 PRJNA593668, respectively.

508

## 509 **Acknowledgements**

510 This work was funded by the Strategic Priority Research Program of the Chinese  
511 Academy of Sciences (Grant No. XDA22050301), China Ocean Mineral Resources  
512 R&D Association Grant (Grant No. DY135-B2-14), National Key R and D Program



513 of China (Grant No. 2018YFC0310800), the Taishan Young Scholar Program of  
514 Shandong Province (tsqn20161051), and Qingdao Innovation Leadership Program  
515 (Grant No. 18-1-2-7-zhc) for Chaomin Sun.

516

## 517 **Author Contributions**

518 CS and RL conceived and designed the study. RL and JZ collected samples and  
519 supported the information of genomes. RL and RC analyzed the data. RL and CS  
520 wrote the manuscript with the input from all authors. All authors read and approved  
521 the final manuscript.

522

## 523 **Competing interests**

524 The authors declare no competing interests

525

## 526 **References**

- 527 36. Chen, Y. *et al.* SOAPnuke: a MapReduce acceleration-supported software for  
528 integrated quality control and preprocessing of high-throughput sequencing data.  
529 *GigaScience* **7**, 1-6, doi:10.1093/gigascience/gix120 (2018).
- 530 37. Li, D., Liu, C. M., Luo, R., Sadakane, K. & Lam, T. W. MEGAHIT: an ultra-fast  
531 single-node solution for large and complex metagenomics assembly via succinct  
532 de Bruijn graph. *Bioinformatics* **31**, 1674-1676,  
533 doi:10.1093/bioinformatics/btv033 (2015).
- 534 38. Kang, D. D. *et al.* MetaBAT 2: an adaptive binning algorithm for robust and  
535 efficient genome reconstruction from metagenome assemblies. *PeerJ* **7**, e7359,  
536 doi:10.7717/peerj.7359 (2019).
- 537 39. Wu, Y. W., Simmons, B. A. & Singer, S. W. MaxBin 2.0: an automated binning  
538 algorithm to recover genomes from multiple metagenomic datasets.  
539 *Bioinformatics* **32**, 605-607, doi:10.1093/bioinformatics/btv638 (2016).
- 540 40. Alneberg, J. *et al.* Binning metagenomic contigs by coverage and composition.  
541 *Nat. Methods* **11**, 1144-1146, doi:10.1038/nmeth.3103 (2014).
- 542 41. Uritskiy, G. V., DiRuggiero, J. & Taylor, J. MetaWRAP-a flexible pipeline for  
543 genome-resolved metagenomic data analysis. *Microbiome* **6**, 158,  
544 doi:10.1186/s40168-018-0541-1 (2018).
- 545 42. Parks, D. H., Imelfort, M., Skennerton, C. T., Hugenholtz, P. & Tyson, G. W.  
546 CheckM: assessing the quality of microbial genomes recovered from isolates,  
547 single cells, and metagenomes. *Genome Res.* **25**, 1043-1055,  
548 doi:10.1101/gr.186072.114 (2015).

- 549 43. Delcher, A. L., Bratke, K. A., Powers, E. C. & Salzberg, S. L. Identifying  
550 bacterial genes and endosymbiont DNA with Glimmer. *Bioinformatics* **23**,  
551 673-679, doi:10.1093/bioinformatics/btm009 (2007).
- 552 44. Lombard, V., Golaconda Ramulu, H., Drula, E., Coutinho, P. M. & Henrissat, B.  
553 The carbohydrate-active enzymes database (CAZy) in 2013. *Nucleic Acids Res.*  
554 **42**, D490-495, doi:10.1093/nar/gkt1178 (2014).
- 555 45. Darling, A. E. *et al.* PhyloSift: phylogenetic analysis of genomes and  
556 metagenomes. *PeerJ* **2**, e243, doi:10.7717/peerj.243 (2014).
- 557 46. Capella-Gutierrez, S., Silla-Martinez, J. M. & Gabaldon, T. trimAl: a tool for  
558 automated alignment trimming in large-scale phylogenetic analyses.  
559 *Bioinformatics* **25**, 1972-1973, doi: 10.1093/bioinformatics/btp348 (2009).
- 560 47. Nguyen, L. T., Schmidt, H. A., von Haeseler, A. & Minh, B. Q. IQ-TREE: a fast  
561 and effective stochastic algorithm for estimating maximum-likelihood  
562 phylogenies. *Mol. Biol. Evol.* **32**, 268-274, doi:10.1093/molbev/msu300 (2015).
- 563 48. Letunic, I. & Bork, P. Interactive tree of life (iTOL) v3: an online tool for the  
564 display and annotation of phylogenetic and other trees. *Nucleic Acids Res.* **44**,  
565 W242-245, doi:10.1093/nar/gkw290 (2016).

566

567

568

569

570

571

572

573

574

575

576

577

578

579

580

581

582

## 583 **Figure Legends**

584 **Fig. 1** Phylogenomic analysis of photosynthetic pigments biosynthesis in  
585 Heimdallarchaeota. **a**, Analysis of bacteriochlorophyll biosynthesis in different  
586 Heimdallarchaeota and other Asgard archaeal genomes. **b, c**, Phylogenetic analyses of  
587 protochlorophyllide reductase (Por) and bacteriochlorophyll synthetase (BCS). A  
588 rooted maximum-likelihood tree of Por (b) or BCS (c) homologs derived from  
589 different photosynthetic organisms identified in this work. The bootstrap support  
590 values 1,000. All proteins and species detailed information used for phylogenetic  
591 analyses are listed in Supplementary Table 3. **d**, Analysis of lycopene biosynthesis in  
592 different Heimdallarchaeota and other Asgard archaeal genomes. For panels a and d,  
593 the solid arrows indicate the enzymes associated with bacteriochlorophyll or lycopene  
594 biosynthesis identified in Heimdallarchaeota MAGs. Dotted arrows indicate the  
595 enzymes associated with bacteriochlorophyll or lycopene biosynthesis not identified  
596 in Heimdallarchaeota MAGs. The light blue box highlights Heimdallarchaeota MAGs  
597 from cold seeps. The light pink box highlights Heimdallarchaeota MAGs from  
598 hydrothermal environment. The light purple box highlights assembled genomes of  
599 other Asgard archaea. The parallelogram box highlights Heimdallarchaeota MAGs  
600 obtained in this study. The detail information of key enzymes involved in  
601 bacteriochlorophyll and lycopene biosynthesis is listed in Supplementary Tables 3 and  
602 5.

603

604 **Fig. 2** Phylogenomic analysis of phylloquinone and plastoquinone biosynthesis in  
605 Heimdallarchaeota. **a**, Analysis of phylloquinone biosynthesis in Heimdallarchaeota.  
606 The detail information of key enzymes involved in phylloquinone biosynthesis is  
607 listed in Supplementary Table 4. SEHCC, 2-Succinyl-5-enolpyruvyl-6-hydroxy-3-cyclohexene-1-carboxylate; SHCHC, (1R,  
608 6R)-2-Succinyl-6-hydroxy-2,4-cyclohexadiene-1-carboxylate. **b**, Phylogenetic  
609 analysis of MenG/UbiE. An unrooted maximum-likelihood tree of MenG/UbiE  
610 homologs derived from different photosynthetic organisms identified in this work.  
611 The bootstrap support values 1,000. The green box highlights proteins annotated as  
612 MenG. The pink box highlights proteins annotated as UbiE. The blue box highlights  
613 proteins ambiguously annotated as MenG or UbiE. **c**, Analysis of plastoquinone  
614 biosynthesis in Heimdallarchaeota. ARO8, 2-aminoadipate transaminase. HPD,

616 4-hydroxyphenylpyruvate dioxygenase. SPS, All-trans-nonaprenyl-diphosphate  
617 synthase. HST, Homogentisate solanesyltransferase. VTE3, MPBQ/MSBQ  
618 methyltransferase. For panels a and c, the solid arrows indicate the enzymes  
619 associated with phylloquinone or plastoquinone biosynthesis identified in  
620 Heimdallarchaeota MAGs. Dotted arrows indicate the enzymes associated with  
621 phylloquinone or plastoquinone biosynthesis not identified in Heimdallarchaeota  
622 MAGs. The detail information of key enzymes involved in phylloquinone or  
623 plastoquinone biosynthesis is listed in Supplementary Tables 4 and 5.

624

625 **Fig. 3** The inferred photosynthetic model of Heimdallarchaeota. Solid lines and  
626 arrows indicate the elements associated with photosystem and electron transport  
627 identified in Heimdallarchaeota MAGs, respectively. Dotted lines and arrows indicate  
628 the elements associated with photosystem and electron transport not identified in  
629 Heimdallarchaeota MAGs, respectively. The detail information of key enzymes  
630 involved in photosystem and electron transport is listed in Supplementary Table 4.

631

632 **Fig. 4** Reconstruction of photomixotrophic lifestyle in Heimdallarchaeota. Solid  
633 arrows indicate the enzymes associated with corresponding metabolic pathway  
634 identified in Heimdallarchaeota MAGs. Dotted arrows indicate the enzymes  
635 associated with corresponding metabolic pathway not identified in Heimdallarchaeota  
636 MAGs. The grey box highlights the photosynthetic pathway present in  
637 Heimdallarchaeota. The detail information of key enzymes mentioned in this figure is  
638 listed in Supplementary Table 5.

# 639 Figures

## 640 Figure 1

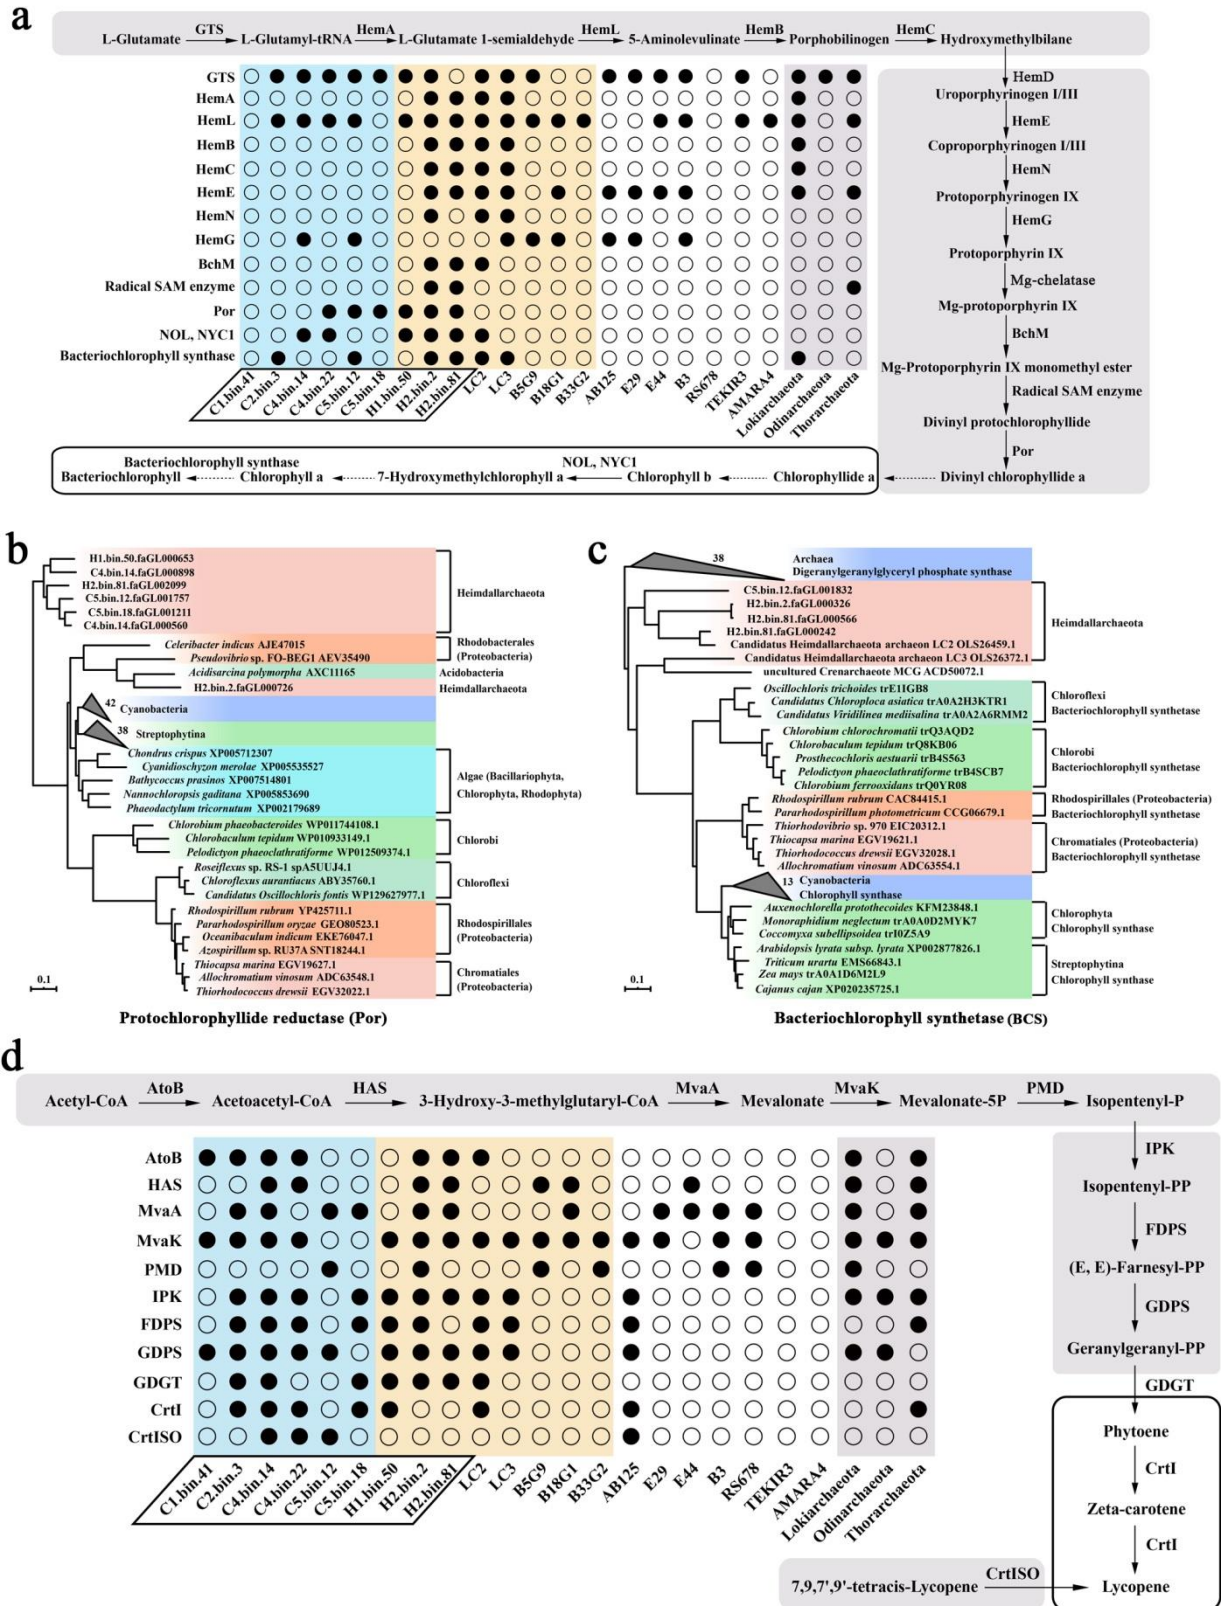



641 **Figure 2**

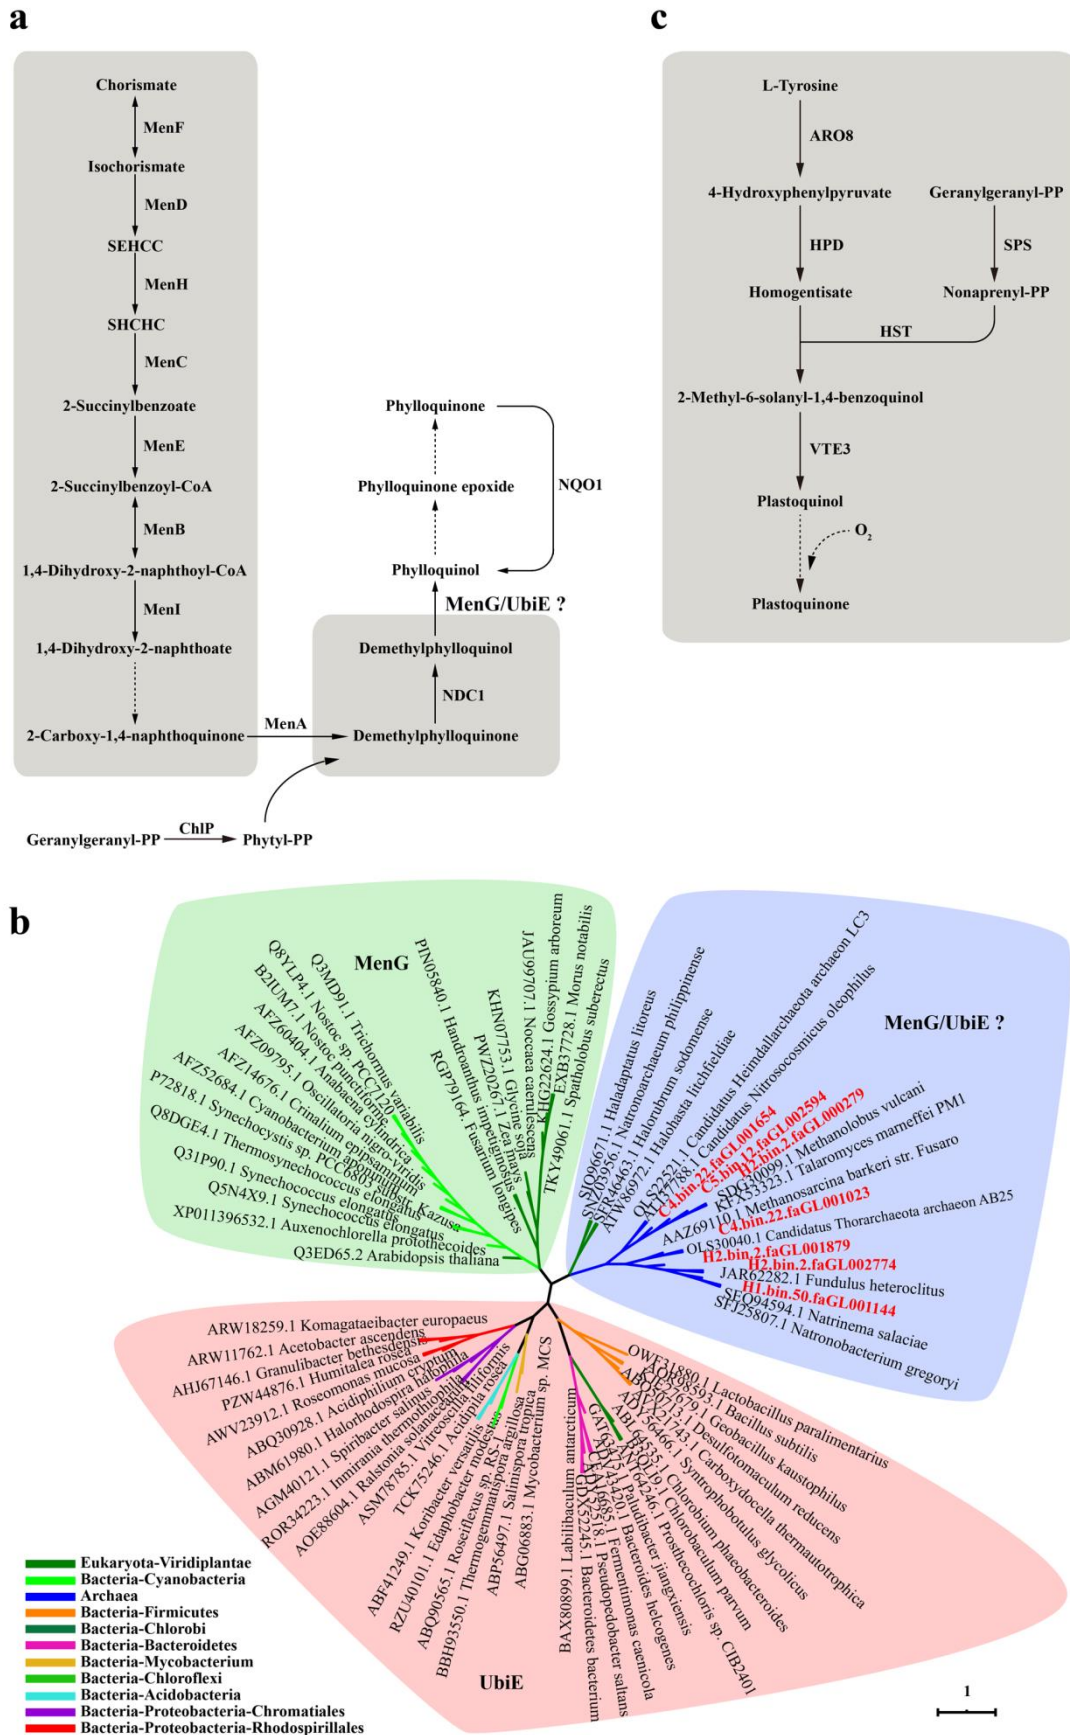

642

643 **Figure 3**

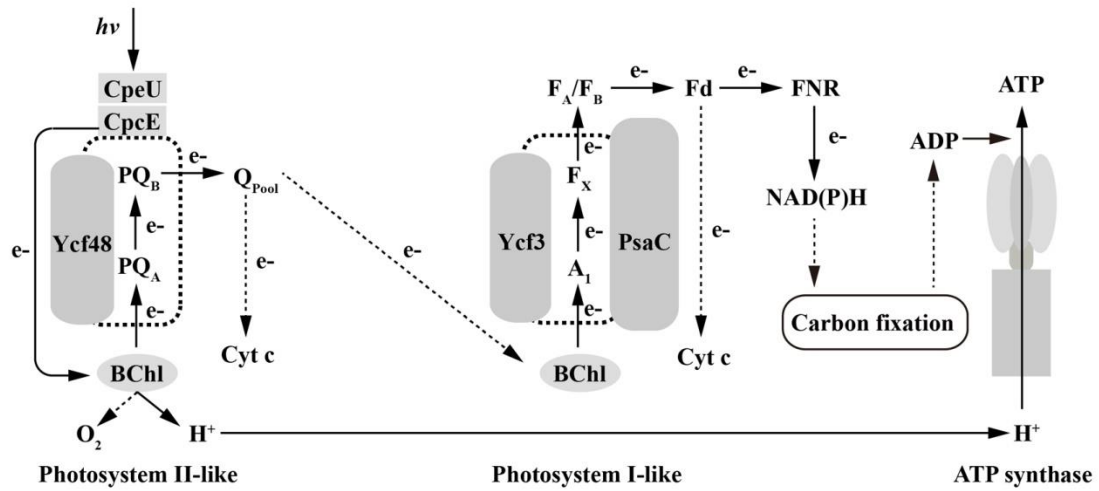

**BChl:** Bacteriochlorophyll

**PQ:** Plastoquinone

**CpcE and CpeU:** Antenna proteins

**Ycf48:** Photosystem II stability/assembly factor

**A<sub>1</sub>:** Phylloquinone

**Cyt c:** Cytochrome c

**PsaC:** Photosystem I subunit VII

**Ycf3:** Photosystem I assembly protein

**F<sub>X</sub>:** Fe<sub>4</sub>-S<sub>4</sub>

**F<sub>A</sub>/F<sub>B</sub>:** 2Fe<sub>4</sub>-S<sub>4</sub>

**Fd:** Ferredoxin

**FNR:** Ferredoxin NADP<sup>+</sup> reductase

644

645

646

647

648

649

650

651

652

653

654

655

656

657

658



659 **Figure 4**

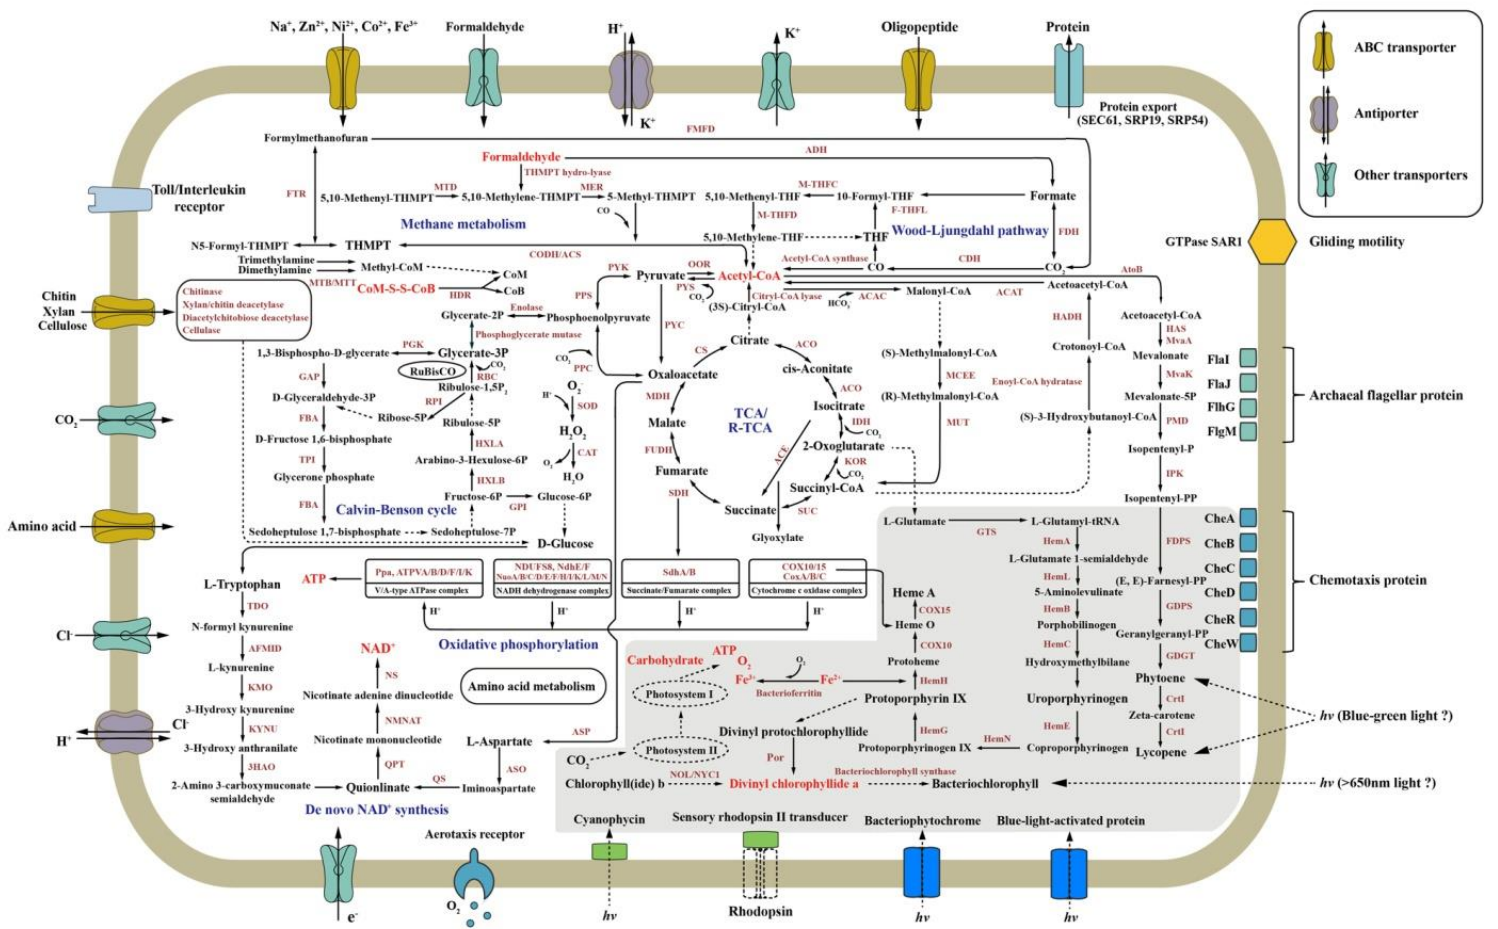

660  
661  
662  
663  
664  
665  
666  
667  
668  
669  
670  
671

## 672 Expanded data Figures

### 673 Expanded data Figure 1

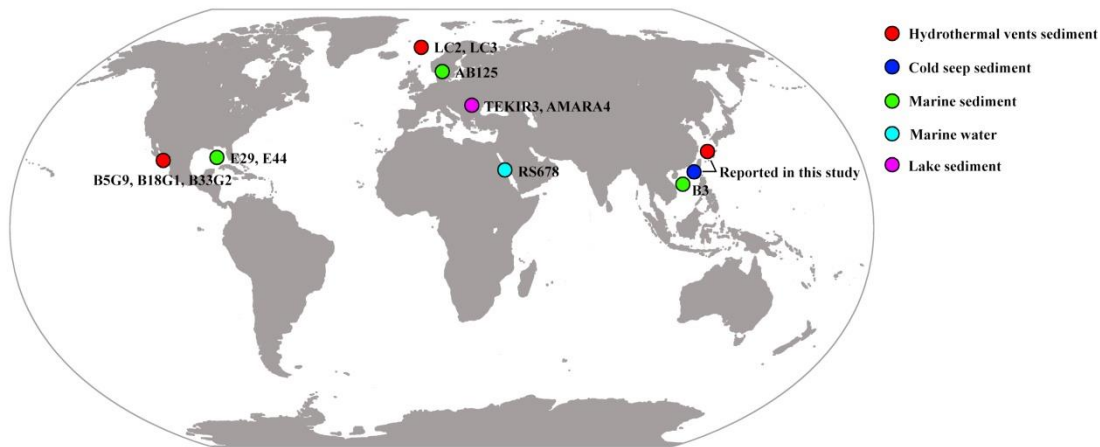

674 **Extended Data Fig. 1** Global distribution of Heimdallarchaeota MAGs reported in  
675 previous and present studies. MAGs LC2 and LC3 are derived from Loki's Castle.  
676 MAG AB125 is derived from Aarhus Bay (Denmark). MAG TEKIR3 is derived from  
677 Tekirghiol (Romania). MAG AMARA4 is derived from Amara (Romania). MAG  
678 RS678 is derived from Red Sea (Saudi Arabia). MAGs B5G9, B18G1 and B33G2 are  
679 derived from Guaymas Basin, Gulf of California (Mexico). MAGs E29 and E44 are  
680 derived from Atlantic Ocean. MAG B3 is derived from the north of the South China  
681 Sea (China).

682

683

684

685

686

687

688

689

690

691

## 692 Expanded data Figure 2

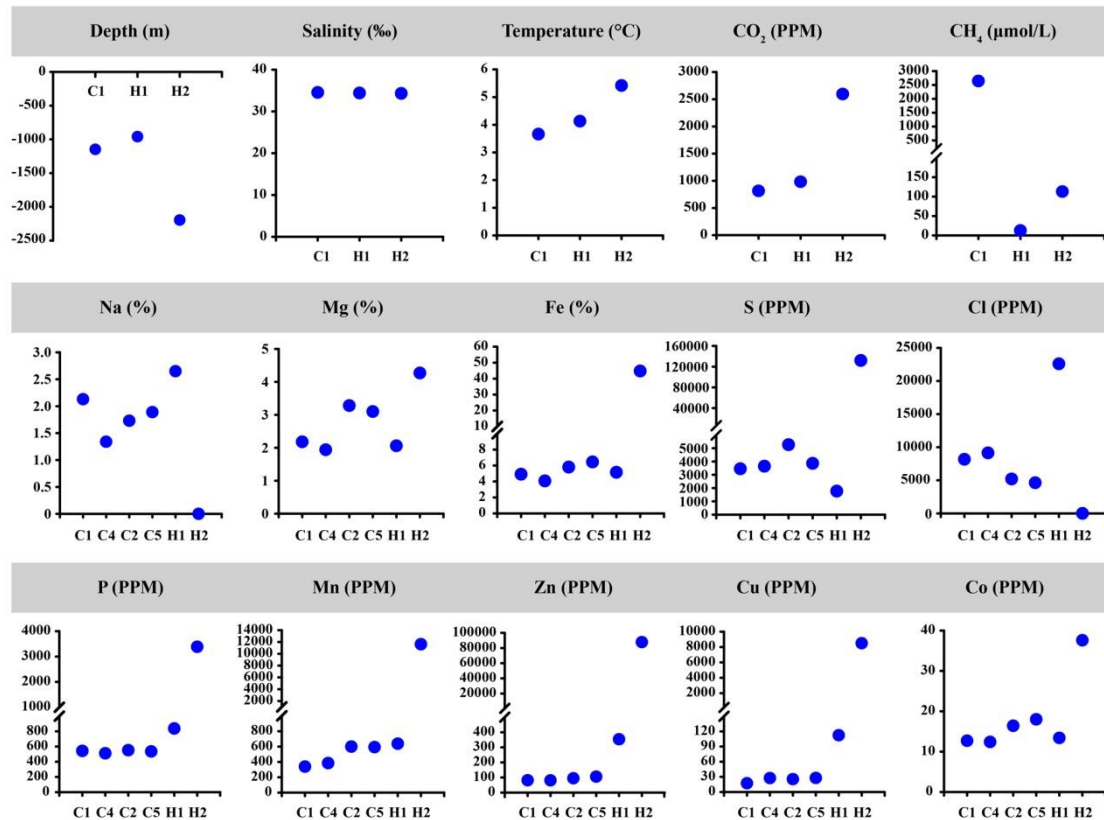

693 **Extended Data Fig. 2** Analyses of environmental and chemical parameters of  
694 sampling sites in the deep-sea cold seep and hydrothermal vents. The temperature,  
695 salinity, underwater depth were recorded in real-time by SBE 25plus Sealogger CTD,  
696 and concentrations of CO<sub>2</sub> and CH<sub>4</sub> of surface sediments were in situ measured with  
697 the CONTROS®HydroCO<sub>2</sub> and Hydro®CH<sub>4</sub>. Contents of different elements  
698 including Na, Mg, Fe, Cl, S, P, Mn, Zn, Ni and Co were measured by an S8 Tiger  
699 X-ray fluorescence spectrometry.

700

701

702

703

704

705

706 **Expanded data Figure 3**

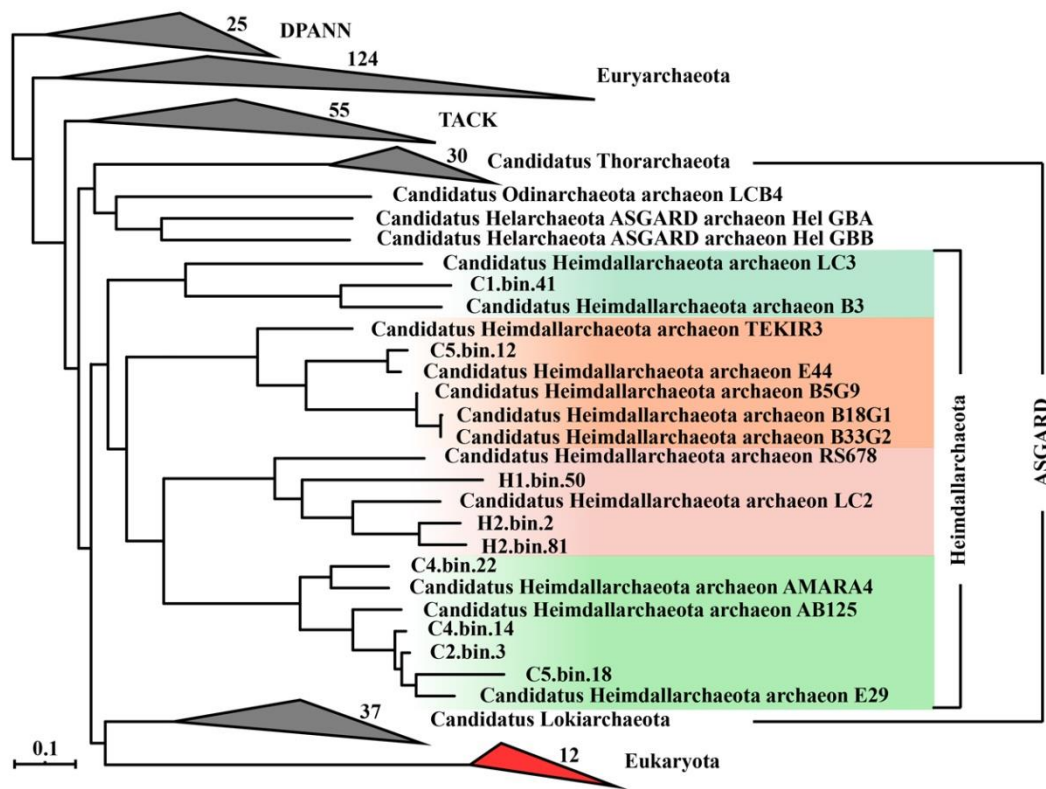

707 **Extended Data Fig. 3** Maximum-likelihood phylogeny of superphyla Asgard, TACK,  
708 Euryarchaeota, DPANN and Eukaryota. Total 37 marker genes chosen by Phylosift,  
709 including 13 small subunit (SSU) and 16 large subunit (LSU) ribosomal RNA genes.  
710 The bootstrap support values 1000. All detailed sequence information of different  
711 species in compressed clades is listed in Supplementary Table 1.

712

713

714

715

716

717

718

719

720

721 **Expanded data Figure 4**

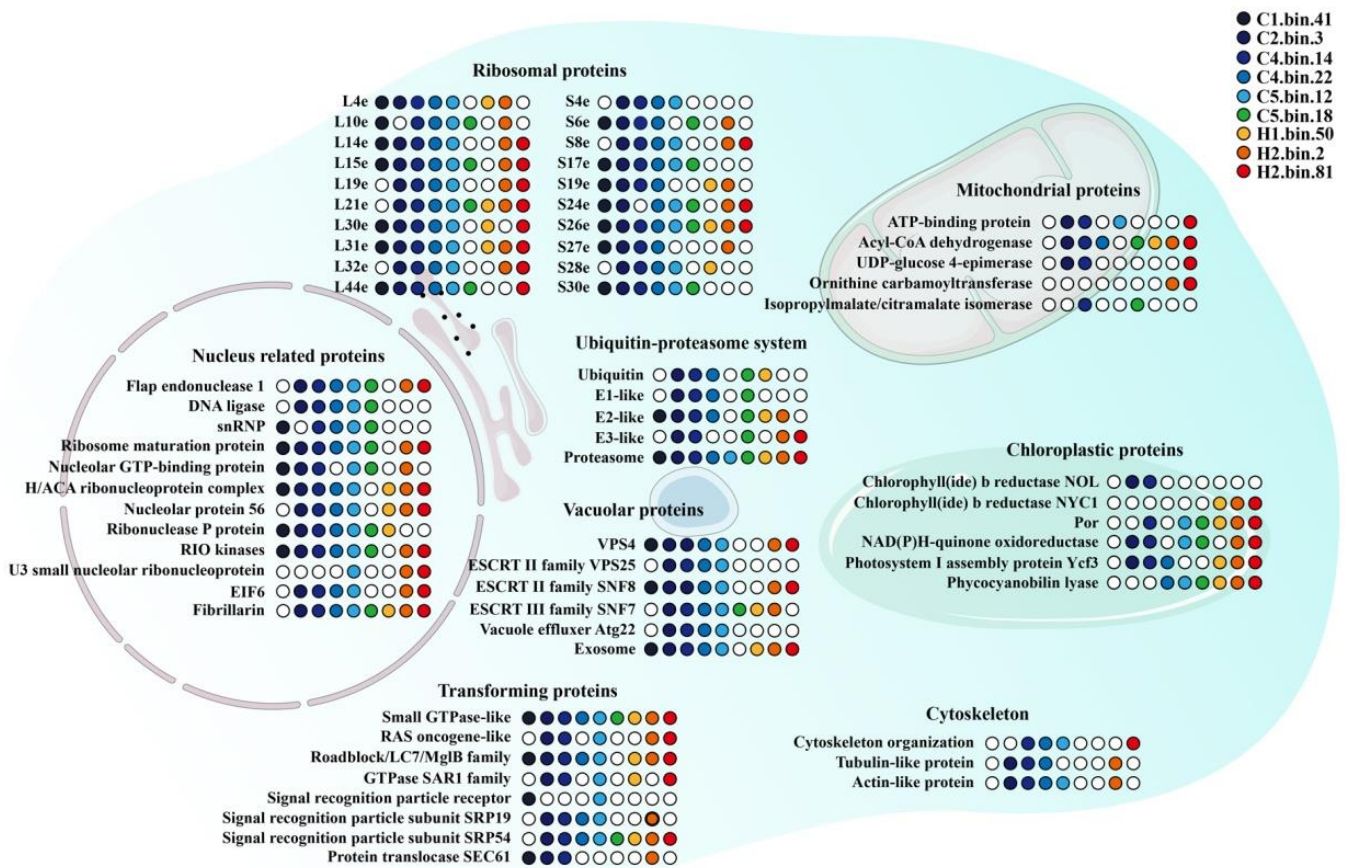

722

723 **Extended Data Fig. 4** Eukaryotic signatures in Heimdallarchaeota. Schematic  
 724 representation of a eukaryotic-like cell in which ESPs that have been identified in  
 725 Heimdallarchaeota are highlighted. The overall illustration indicates that  
 726 Heimdallarchaeota contain both reported eukaryotic signatures and unprecedented  
 727 chloroplastic proteins. All detailed protein information mentioned in this figure is  
 728 listed in Supplementary Table 2.

729

730

731

732

733

734



## 735 Expanded data Figure 5

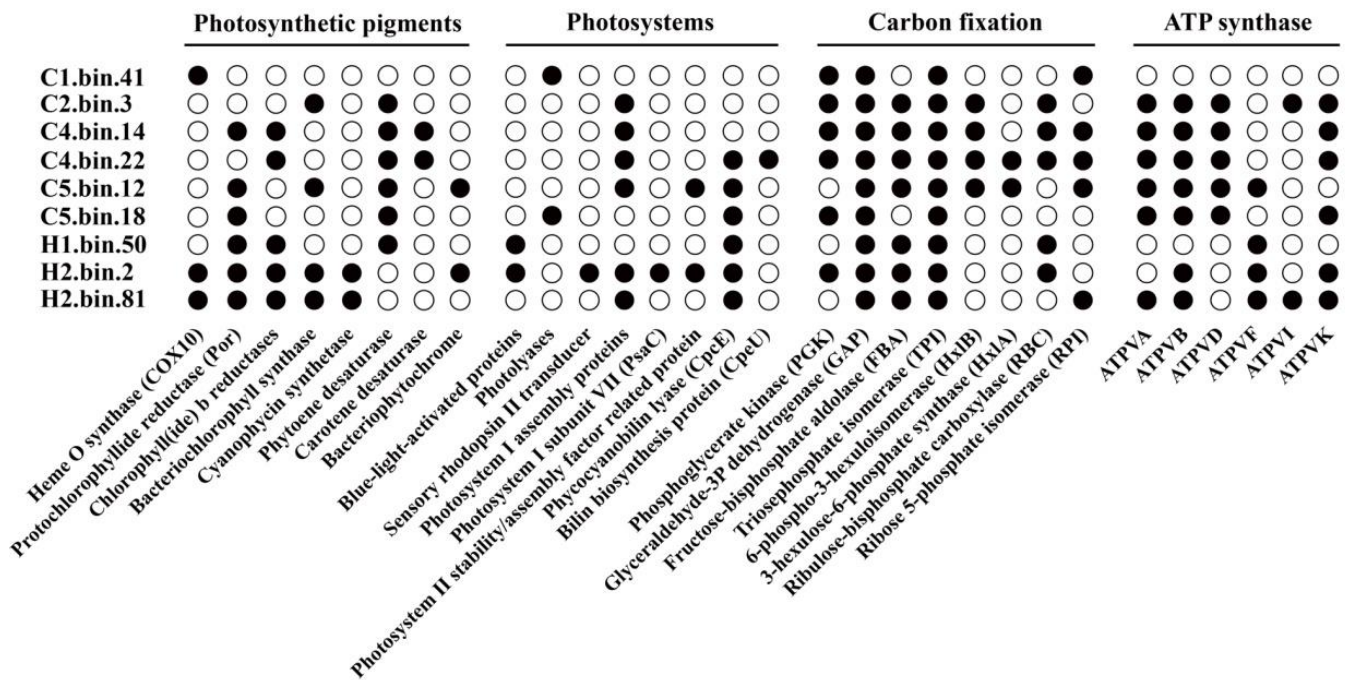

736 **Extended Data Fig. 5** Photosynthetic apparatus identified in Heimdallarchaeota  
 737 MAGs. All detailed protein information mentioned in this figure is listed in  
 738 Supplementary Table 5. ATPVA~ATPVK, V/A-type H<sup>+</sup>/Na<sup>+</sup>-transporting ATPase  
 739 subunits A~K.

740

741

742

743

744

745

746

747

748

749

750

751

## 752 Expanded data Figure 6

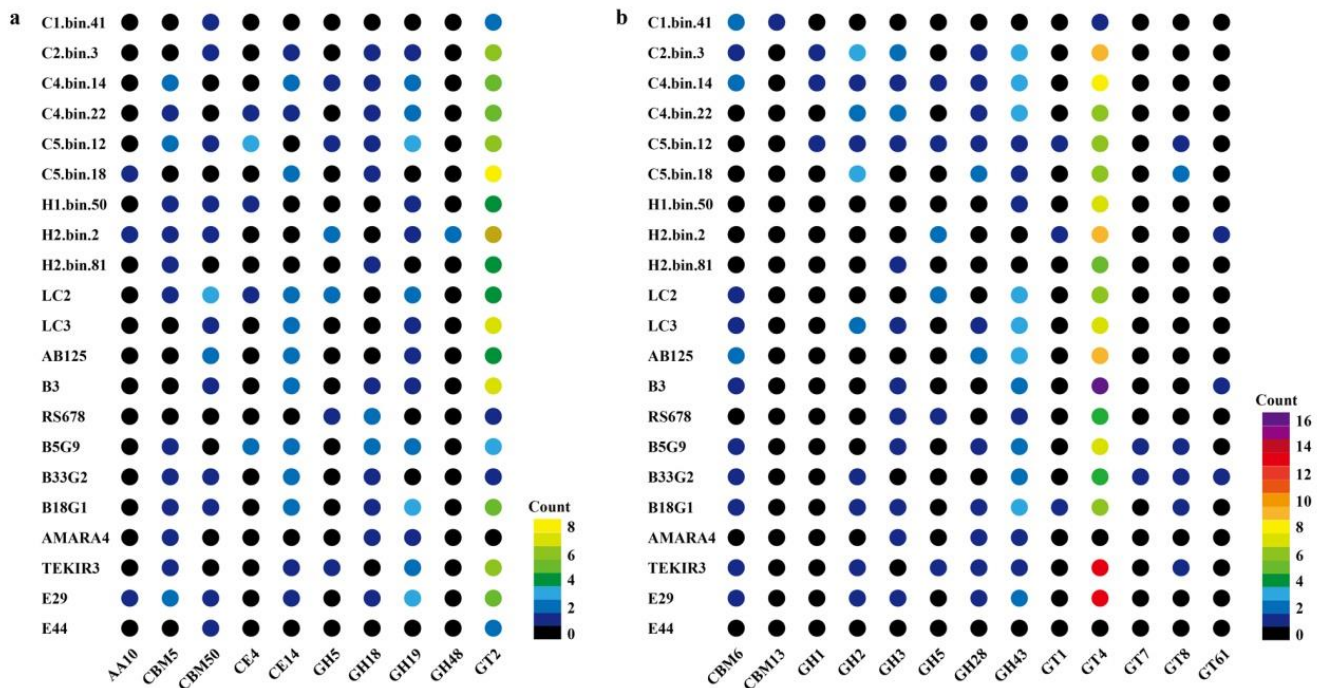

753 **Extended Data Fig. 6** Chitin and xylan metabolic associated enzymes identified in  
 754 Heimdallarchaeota MAGs by CAZy analysis. **a**, Chitin metabolic related enzymes  
 755 identified in Heimdallarchaeota MAGs. **b**, Xylan metabolic associated enzymes  
 756 identified in Heimdallarchaeota MAGs. AAs, auxiliary activities. CBMs,  
 757 carbohydrate-binding modules. CEs, carbohydrate esterases. GHs, glycoside  
 758 hydrolases. GTs, glycosyltransferases. All detailed protein information mentioned in  
 759 this figure is listed in Supplementary Table 5.

760  
 761  
 762  
 763  
 764  
 765  
 766  
 767  
 768  
 769  
 770
